# Supplementary material for: Considerations on diagnosis and surveillance measures of PTEN hamartoma tumor syndrome: clinical and genetic study in a series of Spanish patients
Source: PubMed Central journal article supplement (PMC8886852; doi:10.1186/s13023-021-02079-7), 2022-02-28
Supplement: 13023_2021_2079_MOESM1_ESM.pdf [file 13023_2021_2079_MOESM1_ESM.pdf]

**Supplementary figures**

**Figure S1**

| Group | Sex | Age | Macrocephaly | Livermire-Duclos | Endometrial cancer | Thyroid cancer | Breast cancer | Renal cancer | Colorectal cancer | Endocrine cancer | Lung cancer | Hodgkin lymphoma | Trichilemmomas | Palmoplantar keratoses | Papules | Oral papillomas/fibromas | Gastrointestinal polyps | Thyroid benign lesions | Breast benign lesions | Ovarian benign lesions | Endometrial benign lesions | Autism | Retardation | Overgrowth                                                                              | WES variants                                        |
|-------|-----|-----|--------------|------------------|--------------------|----------------|---------------|--------------|-------------------|------------------|-------------|------------------|----------------|------------------------|---------|--------------------------|-------------------------|------------------------|-----------------------|------------------------|----------------------------|--------|-------------|-----------------------------------------------------------------------------------------|-----------------------------------------------------|
| A     | F   | 65  |              |                  |                    |                |               |              |                   |                  |             |                  |                |                        |         |                          |                         |                        |                       |                        |                            |        |             |                                                                                         | <i>MLH3</i> : p.(I226fs); <i>TSC1</i> : p.(R692Q)   |
|       | F   | 54  |              |                  |                    |                |               |              |                   |                  |             |                  |                |                        |         |                          |                         |                        |                       |                        |                            |        |             |                                                                                         | <i>BAP1</i> : p.(V71M); <i>HERC1</i> : p.(A2539T)   |
|       | F   | 26  |              |                  |                    |                |               |              |                   |                  |             |                  |                |                        |         |                          |                         |                        |                       |                        |                            |        |             |                                                                                         | <i>PDGFRB</i> : p.(S855L); <i>PIK3R2</i> : p.(R94H) |
|       | F   | 55  |              |                  |                    |                |               |              |                   |                  |             |                  |                |                        |         |                          |                         |                        |                       |                        |                            |        |             |                                                                                         | <i>KIF1B</i> : p.(D191G)                            |
|       | M   | 33  |              |                  |                    |                |               |              |                   |                  |             |                  |                |                        |         |                          |                         |                        |                       |                        |                            |        |             |                                                                                         | <i>NEED4</i> : p.(R877Q); <i>RNF135</i> : p.(P233L) |
|       | F   | 57  |              |                  |                    |                |               |              |                   |                  |             |                  |                |                        |         |                          |                         |                        |                       |                        |                            |        |             |                                                                                         | <i>NRG3</i> : p.(R34S); <i>CBL</i> : p.(P628L)      |
|       | F   | 53  |              |                  |                    |                |               |              |                   |                  |             |                  |                |                        |         |                          |                         |                        |                       |                        |                            |        |             |                                                                                         | <i>TOP2A</i> : p.(A402fs)                           |
| B     | M   | 67  |              |                  |                    |                |               |              |                   |                  |             |                  |                |                        |         |                          |                         |                        |                       |                        |                            |        |             |                                                                                         | <i>MUTYH</i> : p.(E410fs); <i>FGFR1</i> p.(T27A)    |
|       | F   | 58  |              |                  |                    |                |               |              |                   |                  |             |                  |                |                        |         |                          |                         |                        |                       |                        |                            |        |             |                                                                                         | <i>REST</i> : p.(R1067H); <i>RNF135</i> : p.(R336H) |
|       | M   | 39  |              |                  |                    |                |               |              |                   |                  |             |                  |                |                        |         |                          |                         |                        |                       |                        |                            |        |             |                                                                                         | <i>PTK2</i> : p.(E811K); <i>PMS2</i> : p.(G497D)    |
| C     | M   | 3   |              |                  |                    |                |               |              |                   |                  |             |                  |                |                        |         |                          |                         |                        |                       |                        |                            |        |             | <i>ATR</i> : p.(M76I); <i>EP400</i> : p.(R1125C) and p.(A2669V); <i>UBN2</i> : p.(Q74X) |                                                     |

**Figure S1.** Clinical manifestations and selected gene variants for the 11 *PTEN*-wt patients studied through WES. Groups A: Patients who meet strict Pilarski<sup>8</sup> diagnostic criteria; group B: patients who developed LDD but do not meet strict Pilarski<sup>8</sup> diagnostic criteria; group C: pediatric case with macrocephaly together with neurological alterations and overgrowth.

**Figure S2**

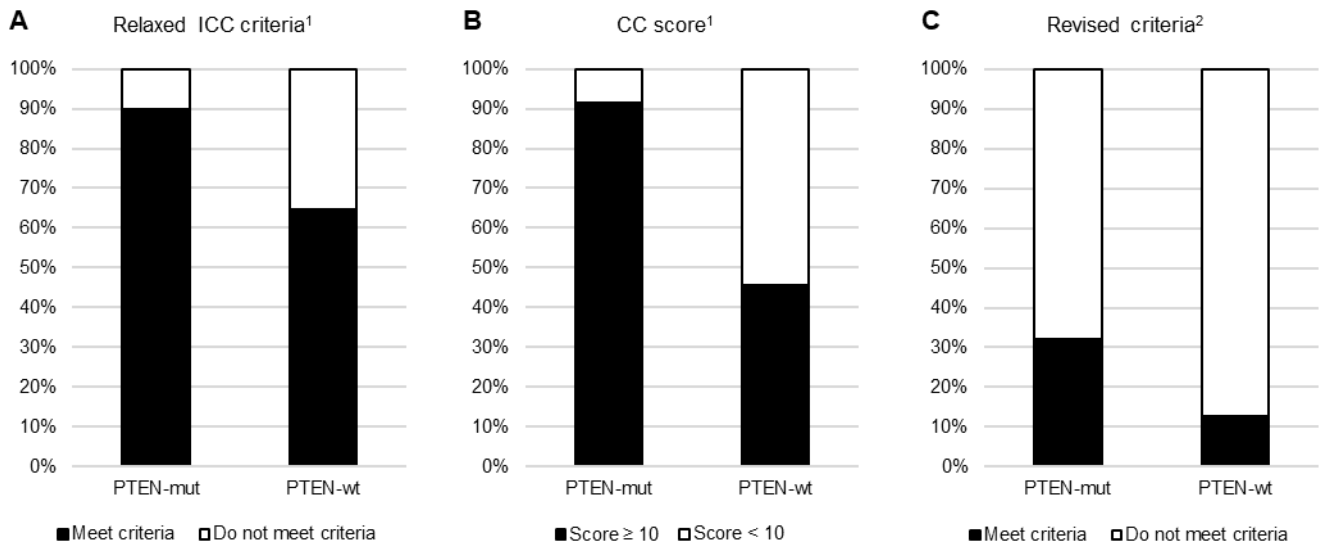

**Figure S2.** Proportion of individuals in each group of our series identified using the indicated diagnostic criteria from the literature (references are listed at the end of this document).

## Supplementary tables

**Table S1.** *PTEN* pathogenic point variants found in our series.

| Sample ID | DNA change     | Protein change     |
|-----------|----------------|--------------------|
| 803F      | c.1_2delAT     | p.0?               |
| 219F      | c.17_18del     | p.(Lys6Argfs*4)    |
| 186F      | c.39_40del     | p.(Arg14Glufs*29)  |
| 864F      | c.39_40del     | p.(Arg14Glufs*29)  |
| 700F      | c.49C>T        | p.(Gln17*)         |
| 427F      | c.58_61dup     | p.(Phe21Trpfs*24)  |
| 30F       | c.68_69insA    | p.(Asp24fs*20)     |
| 1041F     | c.81_82insCT   | p.(Ile28Leufs*27)  |
| 355F      | c.254-1_257dup |                    |
| 1166F     | c.255_256insAA | p.(Ala86Lysfs*14)  |
| 683F      | c.302T>C       | p.(Ile101Thr)      |
| 517F      | c.332G>A       | p.(Trp111*)        |
| 1126F     | c.334C/G       | p.(Leu112Val)      |
| 249F      | c.379G>A       | p.(Gly127Arg)      |
| 55F       | c.388C>T       | p.(Arg130*)        |
| 614F      | c.388C>T       | p.(Arg130*)        |
| 653F      | c.388C>T       | p.(Arg130*)        |
| 757F      | c.389G>A       | p.(Arg130Gln)      |
| 532F      | c.395G>T       | p.(Gly132Val)      |
| 794F      | c.405dup       | p.(Cys136Metfs*44) |
| 1157F     | c.406T>C       | p.(Cys136Arg)      |
| 1251F     | c.406T>C       | p.(Cys136Arg)      |
| 910F      | c.407G>A       | p.(Cys136Tyr)      |
| 836F      | c.492+1delG    |                    |
| 582F      | c.492+1G>C     |                    |
| 44F       | c.493-1G>A     | p.(Gly165fs*)      |

| Sample ID | DNA change     | Protein change     |
|-----------|----------------|--------------------|
| 724F      | c.493-1G>C     | p.(Gly165Ilefs*9)  |
| 817F      | c.493G>C       | p.(Gly165Arg)      |
| 805F      | c.512A>G       | p.(Gln171Arg)      |
| 777F      | c.542T>C       | p.(Leu181Pro)      |
| 232F      | c.622_623insT  | p.(Gly208Valfs*)   |
| 189F      | c.634+5G>A     |                    |
| 250F      | c.635-1G>C     |                    |
| 1085F     | c.640C>T       | p.(Gln214*)        |
| 788F      | c.655C>T       | p.(Gln219*)        |
| 1020F     | c.686C>G       | p.(Ser229*)        |
| 1274F     | c.68T>G        | p.(Leu23*)         |
| 499F      | c.697C>T       | p.(Arg233*)        |
| 518F      | c.697C>T       | p.(Arg233*)        |
| 762F      | c.723_724insTT | p.(Glu242Leufs*15) |
| 578F      | c.817_818del   | p.(Phe273*)        |
| 659F      | c.825del       | p.(Val275*)        |
| 1089F     | c.829dup       | p.(Thr277Asnfs*21) |
| 981F      | c.955_958del   | p.(Thr319*)        |
| 120C      | c.984_987del   | p.(Asn329Lysfs*)   |
| 705F      | c.985_986delAA | p.(Asn329*)        |
| 1105F     | c.1003C>T      | p.(Arg335*)        |
| 262F      | c.1003C>T      | p.(Arg335*)        |
| 687F      | c.1003C>T      | p.(Arg335*)        |
| 750F      | c.1003C>T      | p.(Arg335*)        |
| 795F      | c.1003C>T      | p.(Arg335*)        |
| 621F      | c.1007dup      | p.(Tyr336*)        |

**Table S2.** *PTEN* variants of unknown significance (VUS) found in our series.

| Patient ID | DNA change (ClinVar submission ID) | Protein change | Protein domain | Deleteriousness prediction (Condel) | Phenotype                                                                                                                                                                                                                                   | Variant origin                                                   |
|------------|------------------------------------|----------------|----------------|-------------------------------------|---------------------------------------------------------------------------------------------------------------------------------------------------------------------------------------------------------------------------------------------|------------------------------------------------------------------|
| 789F       | c.77C>T (SCV001245482)             | p.(Thr26Ile)   | Phosphatase    | Probably damaging                   | Male 11 yo. Macrocephaly, obesity, macular pigmentation penis, bilateral gynecomastia, autism, mental retardation, musculoskeletal alterations.                                                                                             | <i>De novo</i>                                                   |
| 707F       | c.254-21G>C (SCV001245485)         | -              | -              | -                                   | Male 10 yo. Macrocephaly, autism, hyperpigmented spots.                                                                                                                                                                                     | Unknown. (Relatives were not tested).                            |
| 1170F      | c.284C>G                           | p.(Pro95Arg)   | Phosphatase    | Probably damaging                   | Male 39 yo. Macrocephaly, overweight, papules, palmoplantar keratoses, trichilemmomas, oral papillomatosis, lipomas, macular pigmentation penis, goiter, Hashimoto's thyroiditis, colonic and gastrointestinal polyps, cerebral hamartomas. | Unknown. (Relatives were not tested).                            |
| 1201F      | c.529T>A (SCV001245483)            | p.(Tyr177Asn)  | Phosphatase    | Probably damaging                   | Male 5 yo. Macrocephaly, motor delay.                                                                                                                                                                                                       | Familial. (Variant segregates in the family with the phenotype). |
| 738F       | c.781C>G (SCV001245484)            | p.(Gln261Glu)  | C2             | Probably damaging                   | Male 34 yo. Macrocephaly, lipomas, macular pigmentation penis, colorectal polyps, general overgrowth.                                                                                                                                       | Familial. (Variant segregates in the family with the phenotype). |
| 1115F      | c.829A>G                           | p.(Thr277Ala)  | C2             | Probably damaging                   | Male 9 yo. Macrocephaly, general developmental disorder, speech delay, general overgrowth.                                                                                                                                                  | <i>De novo</i>                                                   |
| 1103F      | c.929A>G                           | p.(Asp310Gly)  | C2             | Probably neutral                    | Male 29 yo. Macrocephaly, papules, palmoplantar keratoses, thyroid adenomas, papillary-follicular thyroid cancer, colorectal polyps (inflammatory, lymphoid and hamartomatous), testicular cancer.                                          | Unknown. (Only a sister was tested; she was a non-carrier).      |

**Table S3.** Chromosomal regions deleted found in our series through MLPA and aCGH.

| ID    | Deleted region (MLPA)                              | Deleted region (aCGH)               |
|-------|----------------------------------------------------|-------------------------------------|
| 594F  | Entire <i>PTEN</i> *                               | chr10:81,685,169-91,936,008 (10 Mb) |
| 617F  | <i>BMPR1A</i> , <i>KLLN</i> and entire <i>PTEN</i> | chr10:81,660,274-89,830,454 (8 Mb)  |
| 708F  | <i>KLLN</i> and <i>PTEN</i> exon 1                 | chr10:89,625,664-89,640,157 (14 kb) |
| 858F  | <i>KLLN</i> and <i>PTEN</i> exon 1                 | chr10:89,625,664-89,640,157 (14 kb) |
| 814F  | <i>KLLN</i> and <i>PTEN</i> exon 1                 | chr10:89,653,535-89,653,594 (59 pb) |
| 712F  | <i>PTEN</i> exon 6                                 | -                                   |
| 1054F | <i>PTEN</i> exon 3                                 | -                                   |

\*Study performed in 2006 with a probe kit that did not include other genes besides *PTEN*; the remaining DNA could not be used to repeat the study.

**Table S4.** Risk of carrying a *PTEN* germline mutation according to different clinical features, based on analysis of our patient series. Odds ratios obtained with logistic regression.

| Clinical feature               | OR            | CI95          | P value         |
|--------------------------------|---------------|---------------|-----------------|
| <b>Macrocephaly</b>            | <b>11.186</b> | 4.88 - 25.67  | <b>1.21E-08</b> |
| <b>Mucocutaneous lesions</b>   | <b>7.619</b>  | 3.09 - 18.82  | <b>1.07E-05</b> |
| <b>Gastrointestinal polyps</b> | <b>4.488</b>  | 2.08 - 9.7    | <b>0.1E-03</b>  |
| Lhermitte-Duclos disease       | 2.322         | 0.72 - 7.50   | 0.159           |
| <b>Obesity</b>                 | <b>23.045</b> | 2.91 - 182.14 | <b>0.003</b>    |
| Breast cancer                  | 0.208         | 0.08 - 0.52   | 0.001           |
| Thyroid cancer                 | 0.724         | 0.31 - 1.67   | 0.447           |
| Endometrial cancer             | 0.502         | 0.15 - 1.69   | 0.265           |
| Renal cancer                   | 2.062         | 0.33 - 12.76  | 0.436           |
| Colorectal cancer              | 0.153         | 0.02 - 1.26   | 0.081           |
| Family history                 | 1.477         | 0.64 - 3.40   | 0.359           |
| No. of cancers per patient     | 0.546         | 0.36 - 0.82   | 0.004           |
| Cancer onset age               | 0.907         | 0.86 - 0.96   | 0.001           |

**Table S5.** Risk of carrying a *PTEN* germline mutation when the patient presents only a certain clinical feature (for example, a patient who has only LDD and no other clinical manifestation). Odds ratios obtained with logistic regression.

| Clinical feature               | OR            | CI95                | P value         |
|--------------------------------|---------------|---------------------|-----------------|
| Cancer                         | 0.399         | 0.16 - 1.01         | 0.052           |
| <b>Macrocephaly</b>            | <b>11.385</b> | <b>4.29 - 30.21</b> | <b>1.04E-06</b> |
| <b>Mucocutaneous lesions</b>   | <b>6.861</b>  | <b>2.18 - 21.60</b> | <b>0.001</b>    |
| <b>Gastrointestinal polyps</b> | <b>4.220</b>  | <b>1.60 - 11.16</b> | <b>0.004</b>    |
| Lhermitte-Duclos disease       | 3.776         | 0.74 - 19.29        | 0.110           |

**Table S6.** Genotype-phenotype associations found in our series. Chi-square or t-test significance is shown.

| <b><i>PTEN</i> genotype</b> | <b>Phenotype (<i>p</i> value)</b>                                                                                                              |
|-----------------------------|------------------------------------------------------------------------------------------------------------------------------------------------|
| Mutations in exon 1         | ↑Renal cancer ( $p = 0.045$ )<br>↑Palmoplantar keratosis ( $p = 0.01$ )<br>↑Papules ( $p = 0.02$ )                                             |
| Mutations in exon 8         | ↑Musculoskeletal lesions ( $p = 0.03$ )                                                                                                        |
| Large deletions             | ↓Polyposis (gastric: $p = 0.047$ , colorectal: $p = 0.017$ )<br>↓Neurological disorders (autism: $p = 0.03$ , mental retardation $p = 0.03$ ). |

**S7 Table. List of genes included in the multigene panel.**

| <u>Nr</u> | <u>Gene</u>    | <u>Nr</u> | <u>Gene</u>                                                    |
|-----------|----------------|-----------|----------------------------------------------------------------|
| 1         | <i>AKT1</i>    | 24        | <i>FLCN</i>                                                    |
| 2         | <i>AKT2</i>    | 25        | <i>TP53</i>                                                    |
| 3         | <i>AKT3</i>    | 26        | <i>FH</i>                                                      |
| 4         | <i>DEPDC5</i>  | 27        | <i>MET</i>                                                     |
| 5         | <i>MTOR</i>    | 28        | <i>CDKN2A</i>                                                  |
| 6         | <i>PIK3C2B</i> | 29        | <i>AR</i>                                                      |
| 7         | <i>PIK3CA</i>  | 30        | <i>KRAS</i>                                                    |
| 8         | <i>PIK3R1</i>  | 31        | <i>BRAF</i>                                                    |
| 9         | <i>PTEN</i>    | 32        | <i>NRAS</i>                                                    |
| 10        | <i>RICTOR</i>  | 33        | <i>MEN1</i>                                                    |
| 11        | <i>RPTOR</i>   | 34        | <i>DAXX</i>                                                    |
| 12        | <i>STK11</i>   | 35        | <i>ATRX</i>                                                    |
| 13        | <i>TSC1</i>    | 36        | <i>CUL3</i>                                                    |
| 14        | <i>TSC2</i>    | 37        | <i>NF1</i>                                                     |
| 15        | <i>NF2</i>     | 38        | <i>ARID1A</i>                                                  |
| 16        | <i>SETD2</i>   | 39        | <i>CDKN1B</i>                                                  |
| 17        | <i>SMARCB1</i> | 40        | <i>EIF1AX</i>                                                  |
| 18        | <i>USP9X</i>   | 41        | <i>NFE2L2</i>                                                  |
| 19        | <i>BAP1</i>    | 42        | <i>STAG2</i>                                                   |
| 20        | <i>KDM5C</i>   | 43        | <i>TERT</i> _region ATG (250 nt of the promoter)               |
| 21        | <i>KDM6A</i>   | 44        | <i>TFE3</i> fusion (ex2-ex6; incl. intr2-5; ENST00000315869.7) |
| 22        | <i>PBRM1</i>   | 45        | <i>TFEB</i> fusion (1 kb intr2-ex3; ENST00000230323.8)         |
| 23        | <i>VHL</i>     | 46        | <i>TFEB</i> fusion (ex9, intr9, ex10; ENST00000230323.8)       |

**Table S8.** Germline VUS found in mTOR-related genes by NGS.

| ID    | Patient group | Variant          | Gene    | AF   | Consequence          | IMPACT   | Ref gene        | Protein position | Amino acids | Existing variation                          | gnomAD AF | Ch_sig                                           |
|-------|---------------|------------------|---------|------|----------------------|----------|-----------------|------------------|-------------|---------------------------------------------|-----------|--------------------------------------------------|
| 1105F | PTEN-mut      | 1:11273527G>A    | MTOR    | 0.46 | missense             | MODERATE | ENSG00000198793 | 1072             | P/S         |                                             |           |                                                  |
| 1251F | PTEN-mut      | 1:204418411C>T   | PIK3C2B | 0.49 | missense             | MODERATE | ENSG00000133056 | 458              | R/Q         | rs61755372                                  | 0.000658  |                                                  |
| 30F   | PTEN-mut      | 16:2111938G>T    | TSC2    | 0.50 | missense             | MODERATE | ENSG00000103197 | 396              | D/Y         | COSM6143684&<br>COSM6143685                 |           |                                                  |
| 497F  | PTEN-mut      | 16:2122869T>A    | TSC2    | 0.50 | missense             | MODERATE | ENSG00000103197 | 747              | L/Q         | CD010683                                    |           |                                                  |
| 499F  | PTEN-mut      | 14:105246462G>T  | AKT1    | 0.40 | missense             | MODERATE | ENSG00000142208 | 232              | G/E         |                                             |           |                                                  |
| 499F  | PTEN-mut      | 9:135771994G>C   | TSC1    | 0.53 | missense             | MODERATE | ENSG00000165699 | 692              | R/Q         | rs199755731                                 | 0.000171  | uncertain_significance&likely_benign             |
| 594F  | PTEN-mut      | 17:78857246A>G   | RPTOR   | 0.49 | missense             | MODERATE | ENSG00000141564 | 407              | P/L         | rs92237067&C<br>OSM1579117                  | 1.63E-05  |                                                  |
| 700F  | PTEN-mut      | 17:78820280C>T   | RPTOR   | 0.51 | missense             | MODERATE | ENSG00000141564 | 1228             | V/M         | rs147241989                                 | 0.000307  |                                                  |
| 762F  | PTEN-mut      | 19:40761140T>C   | AKT2    | 0.48 | missense             | MODERATE | ENSG00000105221 | 71               | N/S         | rs200272953                                 | 0.000219  |                                                  |
| 794F  | PTEN-mut      | 1:11300579C>T    | MTOR    | 0.51 | missense             | MODERATE | ENSG00000198793 | 523              | D/N         | rs376836258&C<br>OSM3930270                 | 8.12E-06  |                                                  |
| 836F  | PTEN-mut      | 1:204438908C>T   | PIK3C2B | 0.49 | missense             | MODERATE | ENSG00000133056 | 1029             | F/L         | rs61763420                                  | 0.002197  |                                                  |
| 981F  | PTEN-mut      | 17:78935270G>A   | RPTOR   | 0.49 | missense             | MODERATE | ENSG00000141564 | 538              | I/V         |                                             |           |                                                  |
| 981F  | PTEN-mut      | 19:1226587C>G    | STK11   | 0.50 | missense             | MODERATE | ENSG00000118046 | 415              | R/G         | rs864622448                                 |           | uncertain_significance                           |
| 981F  | PTEN-mut      | 17:17131357C>T   | FLCN    | 0.49 | missense             | MODERATE | ENSG00000154803 | 32               | G/E         | rs587778366                                 | 1.22E-05  |                                                  |
| 1065F | PTEN-wt       | 5:38962438T>C    | RICTOR  | 0.50 | missense             | MODERATE | ENSG00000164327 | 565              | Y/C         | rs146754529                                 | 0.000707  |                                                  |
| 1172F | PTEN-wt       | 9:135779171C>T   | TSC1    | 0.67 | missense             | MODERATE | ENSG00000165699 | 1041             | S/R         | rs753374839                                 | 5.31E-05  | uncertain_significance&likely_benign             |
| 1173F | PTEN-wt       | 17:29663905T>G   | NF1     | 0.50 | missense             | MODERATE | ENSG00000196712 | 2113             | C/G         | COSM3958176&<br>COSM3958177                 |           |                                                  |
| 1174F | PTEN-wt       | 17:17127234A>T   | FLCN    | 0.49 | splice_donor_variant | HIGH     | ENSG00000154803 |                  |             | CS101080                                    |           |                                                  |
| 1197F | PTEN-wt       | 1:204429727C>T   | PIK3C2B | 0.52 | missense             | MODERATE | ENSG00000133056 | 750              | G/S         | rs114917235                                 | 0.000557  |                                                  |
| 1198F | PTEN-wt       | 5:38953625G>A    | RICTOR  | 0.50 | missense             | MODERATE | ENSG00000164327 | 910              | R/C         | rs143469898                                 | 0.000187  |                                                  |
| 1210F | PTEN-wt       | 1:204411723G>T   | PIK3C2B | 0.52 | missense             | MODERATE | ENSG00000133056 | 458              | R/Q         | rs61755372                                  | 0.000658  |                                                  |
| 1210F | PTEN-wt       | 1:204429727C>T   | PIK3C2B | 0.48 | missense             | MODERATE | ENSG00000133056 | 8                | G/E         | rs115204119                                 | 0.001045  |                                                  |
| 1708C | PTEN-wt       | 14:105240256C>T  | AKT1    | 0.49 | missense             | MODERATE | ENSG00000142208 | 46               | D/E         | rs146875699                                 | 0.000317  | uncertain_significance&not_provided              |
| 181F  | PTEN-wt       | 17:29553639A>T   | NF1     | 0.48 | missense             | MODERATE | ENSG00000196712 | 730              | N/Y         | rs758893131                                 | 0.000061  | uncertain_significance                           |
| 308F  | PTEN-wt       | 5:67522555A>G    | PIK3R1  | 0.51 | missense             | MODERATE | ENSG00000145675 | 18               | R/G         |                                             |           |                                                  |
| 308F  | PTEN-wt       | 16:2135023A>G    | TSC2    | 0.48 | missense             | MODERATE | ENSG00000103197 | 1522             | N/S         | rs144062721&C<br>OSM3787107&C<br>OSM3787108 | 6.51E-05  | uncertain_significance&not_provided, prob_benign |
| 612F  | PTEN-wt       | 17:17118598C>T   | FLCN    | 0.50 | missense             | MODERATE | ENSG00000154803 | 445              | A/T         | rs41419545                                  | 0.002648  | benign&likely_benign&VUS                         |
| 632F  | PTEN-wt       | 16:2110684C>T    | TSC2    | 0.48 | missense             | MODERATE | ENSG00000103197 | 330              | P/L         | rs140910086                                 | 3.66E-05  | uncertain_significance                           |
| 672F  | PTEN-wt       | 1:204438340T>A   | PIK3C2B | 0.49 | missense             | MODERATE | ENSG00000133056 | 197              | Q/H         | rs17847778                                  | 0.000599  |                                                  |
| 681F  | PTEN-wt       | 19:1223163C>T    | STK11   | 0.49 | missense             | MODERATE | ENSG00000118046 | 367              | T/M         | rs587782835&C<br>OSM21358                   | 1.67E-05  | uncertain_significance                           |
| 860F  | PTEN-wt       | 22:32234798C>A   | DEPDC5  | 0.49 | missense             | MODERATE | ENSG00000100150 | 819              | P/T         |                                             |           |                                                  |
| 995F  | PTEN-wt       | 5:67591042GGAA>G | PIK3R1  | 0.49 | inframe_deletion     | MODERATE | ENSG00000145675 | 546              | E/-         |                                             |           |                                                  |



**Table S9.** Germline *PTEN* status and NGS findings in the indicated tumor samples (each one from a different proband).

| Cancer tissue                  | Germline <i>PTEN</i> status                          | <i>PTEN</i> status in the tumor (NGS) (1) | Other somatic variants found by NGS                  |
|--------------------------------|------------------------------------------------------|-------------------------------------------|------------------------------------------------------|
| Thyroid                        | c.634+5G>A                                           | c.634+5G>A                                | <i>BRAF</i> p.(V600E)                                |
| Rectum                         | WT                                                   | WT                                        | <i>TP53</i> p.(R282W)                                |
| Lung                           | WT                                                   | c.635-1G>A                                | <i>ATRX</i> p.(Q1877H)<br><i>PIK3C2B</i> p.(Q197H)   |
| Thyroid (papillary-follicular) | Large deletion ( <i>KLLN</i> and <i>PTEN</i> exon 1) | *                                         | <i>PIK3CA</i> p.(G1049R)<br><i>USP9X</i> p.(I2120fs) |

\*Large deletions are not called in the NGS pipeline.

(1) In heterozygous status
